# Supplementary material for: Shigella entry unveils a calcium/calpain-dependent mechanism for inhibiting sumoylation
Source: eLife. 2017 Dec 12;6:e27444. doi: 10.7554/eLife.27444 (PMC5745084; doi:10.7554/eLife.27444)
Supplement: Figure 1—figure supplement 1—source data 1. [file elife-27444-fig1-figsupp1-data1.xlsx]

## Sheet: Feuil1
Source data relative to Figure 1-figure supplement 1B
Quantification of the immunoblot signals in uninfected cells or cells infected with the M90T strain for 30 min are presented as conjugated SUMO1 (upper table) or free SUMO1 (lower table) signals relative to Tubulin signal
SUMO1 conjugates	Mean	SD.	#1	#2	#3	#4	#5	#6	#7
Uninfected	100	0	100	100	100	100	100	100	100
30 min post inf	75.2954	9.31055	89.0977	76.0344	56.6552	61.4692	75.1749	76.8604	91.7761
Free SUMO1	Mean	SD.	#1	#2	#3	#4
Uninfected	100	0	100	100	100	100
30 min	120.018	28.9524	156.139	93.6066	88.5248	141.802
Source data relative to Figure 1-figure supplement 1E
Quantification of internalized bacteria, in cells treated with DMSO or Cytochalasin D, at 1 h p-i expressed as the number of colony forming unit (CFU) per well
	Mean	SD	#1	#2	#3
DMSO	1.95333e+06	241937	1680000	2140000	2040000
Cytochalasin D	1600	1587.45	400	3400	1000
