# Supplementary material for: Shigella entry unveils a calcium/calpain-dependent mechanism for inhibiting sumoylation
Source: eLife. 2017 Dec 12;6:e27444. doi: 10.7554/eLife.27444 (PMC5745084; doi:10.7554/eLife.27444)
Supplement: Figure 1—source data 1. [file elife-27444-fig1-data1.xlsx]

## Sheet: Feuil1
Source data relative to Figure 1E
Quantification of the immunoblot signals are presented as SUMO-RanGAP1 signal relative to unmodified RanGAP1 signal
Image J				SUMO-RanGAP1 / RanGAP1 ratio
		Mean	SD.	#1	#2	#3	#4
Uninfected		3.10011	0.651841	2.55464	2.74043	3.08463	4.02073
Shigella M90T (min post-infection)	30	3.58644	1.49488	1.92677	3.67786	3.2062	5.53492
	60	2.52284	0.744558	2.65857	2.32074	1.66114	3.4509
	90	2.46486	0.962083	1.94347	1.87601	N/A	3.57509
	120	1.51582	0.367366	1.51685	1.4291	1.11499	2.00232
	150	1.12087	0.213638	1.06297	0.859377	1.19635	1.36479
Source data relative to Figure 1G
Quantification of the immunoblot signals are presented as SUMO-PML-IV signal relative to unmodified GFP-PML-IV signal
Image J				SUMO-PML IV / PML IV ratio
		Mean	SD.	#1	#2	#3
Uninfected		1.05006	0.16703	1.16307	0.858204	1.12892
Shigella M90T (min post-infection)	30	1.10422	0.20656	1.2433	0.866874	1.20249
	60	1.08904	0.246885	1.24206	0.80423	1.22085
	90	1.12703	0.206063	1.27346	0.891393	1.21624
	120	0.692638	0.307825	0.884407	0.337573	0.855935
	150	0.313728	0.157471	0.379654	0.134008	0.427521
