# Supplementary material for: Shigella entry unveils a calcium/calpain-dependent mechanism for inhibiting sumoylation
Source: eLife. 2017 Dec 12;6:e27444. doi: 10.7554/eLife.27444 (PMC5745084; doi:10.7554/eLife.27444)
Supplement: Figure 4—figure supplement 1—source data 1. [file elife-27444-fig4-figsupp1-data1.xlsx]

## Sheet: Feuil1
Source data relative to Figure 4 -figure supplement 1
Measurement of the release of fluorescent AMC at 30 min (emission length 460 nm)
SUMO1-AMC	Mean	sd.	#1	#2	#3	#4
Reaction buffer	19.5	3.13581	19	23	15.5	20.5
SENP2	3429.5	22.6532	3407	3413	3448.5	3449.5
Shigella lysate	21	8.97218	15	32	24.5	12.5
SUMO2-AMC	Mean	sd.	#1	#2	#3	#4
Reaction buffer	-1	12.0485	-13	4	13.5	-8.5
SENP2	4335.75	17.8536	4320	4356	4345.5	4321.5
Shigella lysate	17	7.24569	10	13	18.5	26.5
