# Supplementary material for: Shigella entry unveils a calcium/calpain-dependent mechanism for inhibiting sumoylation
Source: eLife. 2017 Dec 12;6:e27444. doi: 10.7554/eLife.27444 (PMC5745084; doi:10.7554/eLife.27444)
Supplement: Figure 5—source data 1. [file elife-27444-fig5-data1.xlsx]

## Sheet: Feuil1
Source data relative to Figure 5B
Percentage of Shigella internalization upon siRNA-mediated knockdown of UBC9 and SAE2 in HeLa cells relative to control siRNA (100%).
	Mean	SEM	#1	#2	#3	#4	#5	#6
siScr	100	0	100	100	100	100	100	100
siUbc9	183.743	40.732	228.497	84.4444	293.333	164.035	165.561	166.587
siSAE2	180.447	53.6863	147.778	132.384	365.556	111.436	172.84	152.689
Source data relative to Figure 5C
Quantification of the average number of actin foci per Hela cell upon siRNA-mediated knockdown of UBC9 and SAE2
	Mean	SD	#1	#2	#3	#4
siScr	2.34464	0.227219	2.35135	2.3235	2.0741	2.6296
siUbc9	4.11678	0.499033	4.2778	3.5226	3.963	4.7037
siSAE2	3.80014	0.663708	3.4706	3.32258	3.6296	4.77778
Source data relative to Figure 5F
Percentage of Shigella internalization in Ubc9 WT and Ubc9 KO MEFs relative to Ubc9 WT (100%)
	Mean	SEM	#1	#2	#3	#4	#5	#6	#7	#8	#9
Ubc9 WT	100	0	100	100	100	100	100	100	100	100	100
Ubc9 KO	144.19	21.5441	142.424	150	125	221.429	177.778	112.5	95.0208	144.156	129.405
Source data relative to Figure 5G
Quantification of the average number of actin foci in Ubc9 WT and Ubc9 KO MEF
	Mean	SD	#1	#2	#3
Ubc9 WT	4.53775	0.340343	4.18182	4.57143	4.86
Ubc9 KO	6.65222	0.447012	6.67925	6.19231	7.08511
