# Supplementary material for: Shigella entry unveils a calcium/calpain-dependent mechanism for inhibiting sumoylation
Source: eLife. 2017 Dec 12;6:e27444. doi: 10.7554/eLife.27444 (PMC5745084; doi:10.7554/eLife.27444)
Supplement: Figure 6—source data 1. [file elife-27444-fig6-data1.xlsx]

## Sheet: Feuil1
Source data relative to Figure 6B
Percentage of Shigella internalization upon siRNA-mediated knockdown of RhoGDIα relative to control siRNA (100%).
	Mean	SEM	#1	#2	#3	#4	#5	#6	#7	#8	#9	#10	#11
siScr	100	0	100	100	100	100	100	100	100	100	100	100	100
siRhoGDI	170.891	20.3709	169.697	147.486	133.133	178.014	180.892	224.818	141.463	232.558	131.818	194.643	145.283
Source data relative to Figure 6E
Average number of actin foci per Hela cells co-transfected with siRhoGDIα (targeting the 3’UTR) together with either GFP-tagged sRhoGDIα WT or GFP-tagged RhoGDIα K138R.
	Mean	SD	#1	#2	#3	#4
RhoGDI WT	1.80882	0.074018	1.82353	1.70588	1.82353	1.88235
RhoGDI K138R	2.66176	0.226058	2.70588	2.64706	2.92157	2.37255
Source data relative to Figure 6H
Quantification of the immunoblot signals obtained from Ubc9 WT or Ubc9 KO MEF protein extracts are presented as RhoGTPase signal (Cdc42, RhoA or Rac1) relative to tubulin signal
Cdc42		Mean	SD	#1	#2	#3	#4	#5
plasma membrane	Ubc9 WT	1	0	1	1	1	1	1
	Ubc9 KO	1.35453	0.146986	1.37625	1.24757	1.20198	1.36627	1.58058
RhoA
plasma membrane	Ubc9 WT	1	0	1	1	1	1	1
	Ubc9 KO	1.41688	0.314881	1.26287	0.943123	1.73079	1.59172	1.5559
Rac1
plasma membrane	Ubc9 WT	1	0	1	1	1	1	1
	Ubc9 KO	1.29452	0.149982	1.26601	1.18154	1.19458	1.55174	1.27872
