# Supplementary material for: Shigella entry unveils a calcium/calpain-dependent mechanism for inhibiting sumoylation
Source: eLife. 2017 Dec 12;6:e27444. doi: 10.7554/eLife.27444 (PMC5745084; doi:10.7554/eLife.27444)
Supplement: Figure 7—source data 1. [file elife-27444-fig7-data1.xlsx]

## Sheet: Feuil1
Source data relative to Figure 7B, D and F
Calculation of the Pearson’s coefficient to evaluate the signal intensity correlation between SUMO1 (Figure 7B), SUMO2/3 (Figure 7D), RhoGDIa (Figure 7E) and Shigella-induced actin foci stainings. Data are means ± SEM (at least 40 foci analyzed per condition).
	RhoGDI / Actin			SUMO1 / Actin			SUMO2/3 / Actin					RhoGDI / Actin			SUMO1			SUMO2/3 / Actin
	Ubc9 WT	Ubc9 KO		Ubc9 WT	Ubc9 KO		Ubc9 WT	Ubc9 KO				Ubc9 WT	Ubc9 KO		Ubc9 WT	Ubc9 KO		Ubc9 WT	Ubc9 KO
	0.13	0.43		0.42	-0.33		0.58	0.06				0.13074	0.459897		0.447692	-0.342828		0.662463	0.0600722
	0.72	0.53		0.3	0.14		0.4	0.42				0.907645	0.590145		0.30952	0.140926		0.423649	0.447692
	0.66	0.69		0.32	0.4		0.44	0.4				0.792814	0.847956		0.331647	0.423649		0.472231	0.423649
	0.56	0.74		0.25	0.34		0.5	0.28				0.632833	0.950479		0.255413	0.354093		0.549306	0.287682
	0.1	0.57		0.24	0.2		0.58	0.26				0.100335	0.647523		0.244774	0.202733		0.662463	0.266108
	0.21	0.79		0.48	0.04		0.24	-0.07				0.213171	1.07143		0.522984	0.0400214		0.244774	-0.0701147
	0.39	0.59		0.29	0.13		0.3	0.45				0.4118	0.677666		0.298566	0.13074		0.30952	0.4847
	0.31	0.46		0.26	0.06		0.44	0.37				0.320545	0.497311		0.266108	0.0600722		0.472231	0.388423
	0.63	0.6		0.65	0.24		0.35	0.13				0.741416	0.693147		0.775299	0.244774		0.365444	0.13074
	0.66	0.64		0.44	-0.02		0.31	0.06				0.792814	0.758174		0.472231	-0.0200027		0.320545	0.0600722
	0.51	0.39		0.45	0.29		0.34	0.44				0.56273	0.4118		0.4847	0.298566		0.354093	0.472231
	0.38	0.37		0.42	0.05		0.21	0.53				0.40006	0.388423		0.447692	0.0500417		0.213171	0.590145
	0.32	0.59		0.37	-0.01		0.55	0.43				0.331647	0.677666		0.388423	-0.0100003		0.618381	0.459897
	0.37	0.5		0.49	0.42		0.5	0.6				0.388423	0.549306		0.53606	0.447692		0.549306	0.693147
	0.33	0.54		0.57	0.32		0.32	0.42				0.342828	0.604156		0.647523	0.331647		0.331647	0.447692
	0.28	0.28		0.83	0.14		0.44	0.37				0.287682	0.287682		1.18814	0.140926		0.472231	0.388423
	0.46	0.15		0.41	0.13		0.46	0.41				0.497311	0.15114		0.435611	0.13074		0.497311	0.435611
	0.52	0.31		0.27	-0.04		0.22	0.07				0.57634	0.320545		0.276864	-0.0400214		0.223656	0.0701147
	0.4	0.38		0.21	0.46		0.19	0.4				0.423649	0.40006		0.213171	0.497311		0.192337	0.423649
	0.36	0.32		0.33	0.3		0.37	0.29				0.376886	0.331647		0.342828	0.30952		0.388423	0.298566
	0.39	0.56		0.46	0.32		0.31	0.28				0.4118	0.632833		0.497311	0.331647		0.320545	0.287682
	0.56	0.27		0.36	0.12		0.03	0.35				0.632833	0.276864		0.376886	0.120581		0.030009	0.365444
	0.71	0.67		0.36	-0.02		0.35	0.52				0.887184	0.810743		0.376886	-0.0200027		0.365444	0.57634
	0.48	0.54		0.45	0.29		0.35	0.11				0.522984	0.604156		0.4847	0.298566		0.365444	0.110447
	0.52	0.56		0.39	0.44		0.19	0.5				0.57634	0.632833		0.4118	0.472231		0.192337	0.549306
	0.49	0.22		0.58	0.19		0.18	0.35				0.53606	0.223656		0.662463	0.192337		0.181983	0.365444
	0.54	0.55		0.28	0.06		0.33	0.23				0.604156	0.618381		0.287682	0.0600722		0.342828	0.234189
	0.45	0.38		0.49	0.59		0.02	-0.06				0.4847	0.40006		0.53606	0.677666		0.0200027	-0.0600722
	0.44	0.13		0.39	0.69		0.53	0.31				0.472231	0.13074		0.4118	0.847956		0.590145	0.320545
	0.6	0.56		0.42	0.19		0.09	0.46				0.693147	0.632833		0.447692	0.192337		0.0902442	0.497311
	0.51	0.54		0.36	0.06		0.52	0.16				0.56273	0.604156		0.376886	0.0600722		0.57634	0.161387
	0.24	0.53		0.37	0.6		0.51	0.32				0.244774	0.590145		0.388423	0.693147		0.56273	0.331647
	0.38	0.48		0.53	0.41		0.51	0.34				0.40006	0.522984		0.590145	0.435611		0.56273	0.354093
	0.35	0.85		0.33	0.35		0.59	0.28				0.365444	1.25615		0.342828	0.365444		0.677666	0.287682
	0.45	0.79		0.53	0.47		0.31	0.3				0.4847	1.07143		0.590145	0.51007		0.320545	0.30952
	0.34	0.43		0.47	0.21		0.62	-0.21				0.354093	0.459897		0.51007	0.213171		0.725005	-0.213171
	0.06	0.51		0.2	0.23		0.39	0.17				0.0600722	0.56273		0.202733	0.234189		0.4118	0.171667
	0.38	0.54		0.69	-0.22		0.22					0.40006	0.604156		0.847956	-0.223656		0.223656
	0.43	0.68		0.57	0.12							0.459897	0.829114		0.647523	0.120581
	0.43	0.16		0.3	0.3							0.459897	0.161387		0.30952	0.30952
	0.53	0.46			0.43							0.590145	0.497311			0.459897
	0.8	0.44			0.29							1.09861	0.472231			0.298566
	0.37	0.39			0.44							0.388423	0.4118			0.472231
	0.16	0.06			0.38							0.161387	0.0600722			0.40006
	0.49	0.69			0.56							0.53606	0.847956			0.632833
	-0.14	0.56			0.51							-0.140926	0.632833			0.56273
	0.53				-0.05							0.590145				-0.0500417
	0.45				-0.45							0.4847				-0.4847
	0.56				0.28							0.632833				0.287682
	0.73				0.27							0.928727				0.276864
	0.22				0.17							0.223656				0.171667
	0.58				0.39							0.662463				0.4118
	0.59				0.26							0.677666				0.266108
	0.64				0.47							0.758174				0.51007
	0.51				0.09							0.56273				0.0902442
	0.3				0.29							0.30952				0.298566
	0.56				0.28							0.632833				0.287682
	0.7				-0.24							0.867301				-0.244774
	0.5				-0.03							0.549306				-0.030009
	0.45				0.13							0.4847				0.13074
	0.51				0.22							0.56273				0.223656
	0.44				0.33							0.472231				0.342828
	0.49				0.39							0.53606				0.4118
	0.46				0.42							0.497311				0.447692
	0.57											0.647523
	0.67											0.810743
	0.61											0.708921
	0.69											0.847956
	0.49											0.53606
	0.72											0.907645
	0.65											0.775299
	0.55											0.618381
	0.63											0.741416
	0.5											0.549306
	0.63											0.741416
	0.5											0.549306
	0.49											0.53606
RhoGDI	0.2		SUMO1			SUMO2/3						0.202733
mean	0.46641	0.487391		0.41325	0.226406		0.362895	0.29
SD.	0.170538	0.179758		0.135654	0.222071		0.1561	0.182117			mean	0.526723			0.454619			0.391648
sem	0.0193096	0.0265039		0.0214488	0.0277589		0.0253227	0.0299399			SD	0.220814			0.190345			0.182273
p-value is .65272											z test		0.137572			1			0.997288
	n=78	n=46		n=40	n=64		n=38	n=37				p value	0.862428	p value		7.06102e-14	p value		0.00271203
												Rhogdi		SUMO1			SUMO2/3
