# Supplementary material for: Shigella entry unveils a calcium/calpain-dependent mechanism for inhibiting sumoylation
Source: eLife journal article supplement (doi:10.7554/elife.27444), 2017-12-12
Supplement: supp [file elife-27444-supp-v1.zip]

|    |        |              |                                                     |
|----|--------|--------------|-----------------------------------------------------|
| sp | P19803 | GDIR1_BOVIN  | SFVLKEGVEYRIKISFRVNREIVSGMKYIQHTYRKGVKIDKTDYMGVGSYG |
| tr | F6W039 | F6W039_HORSE | SFVLKEGVEYRIKISFRVNREIVSGMKYIQHTYRKGVKIDKTDYMGVGSYG |
| tr | F1PL93 | F1PL93_CANFA | SFVLKEGVEYRIKISFRVNREIVSGMKYIQHTYRKGVKIDKTDYMGVGSYG |
| sp | Q99PT1 | GDIR1_MOUSE  | SFVLKEGVEYRIKISFRVNREIVSGMKYIQHTYRKGVKIDKTDYMGVGSYG |
| sp | Q5XI73 | GDIR1_RAT    | SFVLKEGVEYRIKISFRVNREIVSGMKYIQHTYRKGVKIDKTDYMGVGSYG |
| tr | M3WQS4 | M3WQS4_FELCA | SFVLKEGVEYRIKISFRVNREIVSGMKYIQHTYRKGVKIDKTDYMGVGSYG |
| tr | G3WB53 | G3WB53_SARHA | SFVLKEGVEYRIKISFQVNREIVSGMKYIQHTYRKGVKIDKTDYMGVGSYG |
| sp | P52565 | GDIR1_HUMAN  | SFVLKEGVEYRIKISFRVNREIVSGMKYIQHTYRKGVKIDKTDYMGVGSYG |

**Figure 6-Figure supplement 1**
