# Supplementary figures and images for: Shigella entry unveils a calcium/calpain-dependent mechanism for inhibiting sumoylation
Source: eLife journal article supplement (doi:10.7554/elife.27444), 2017-12-12

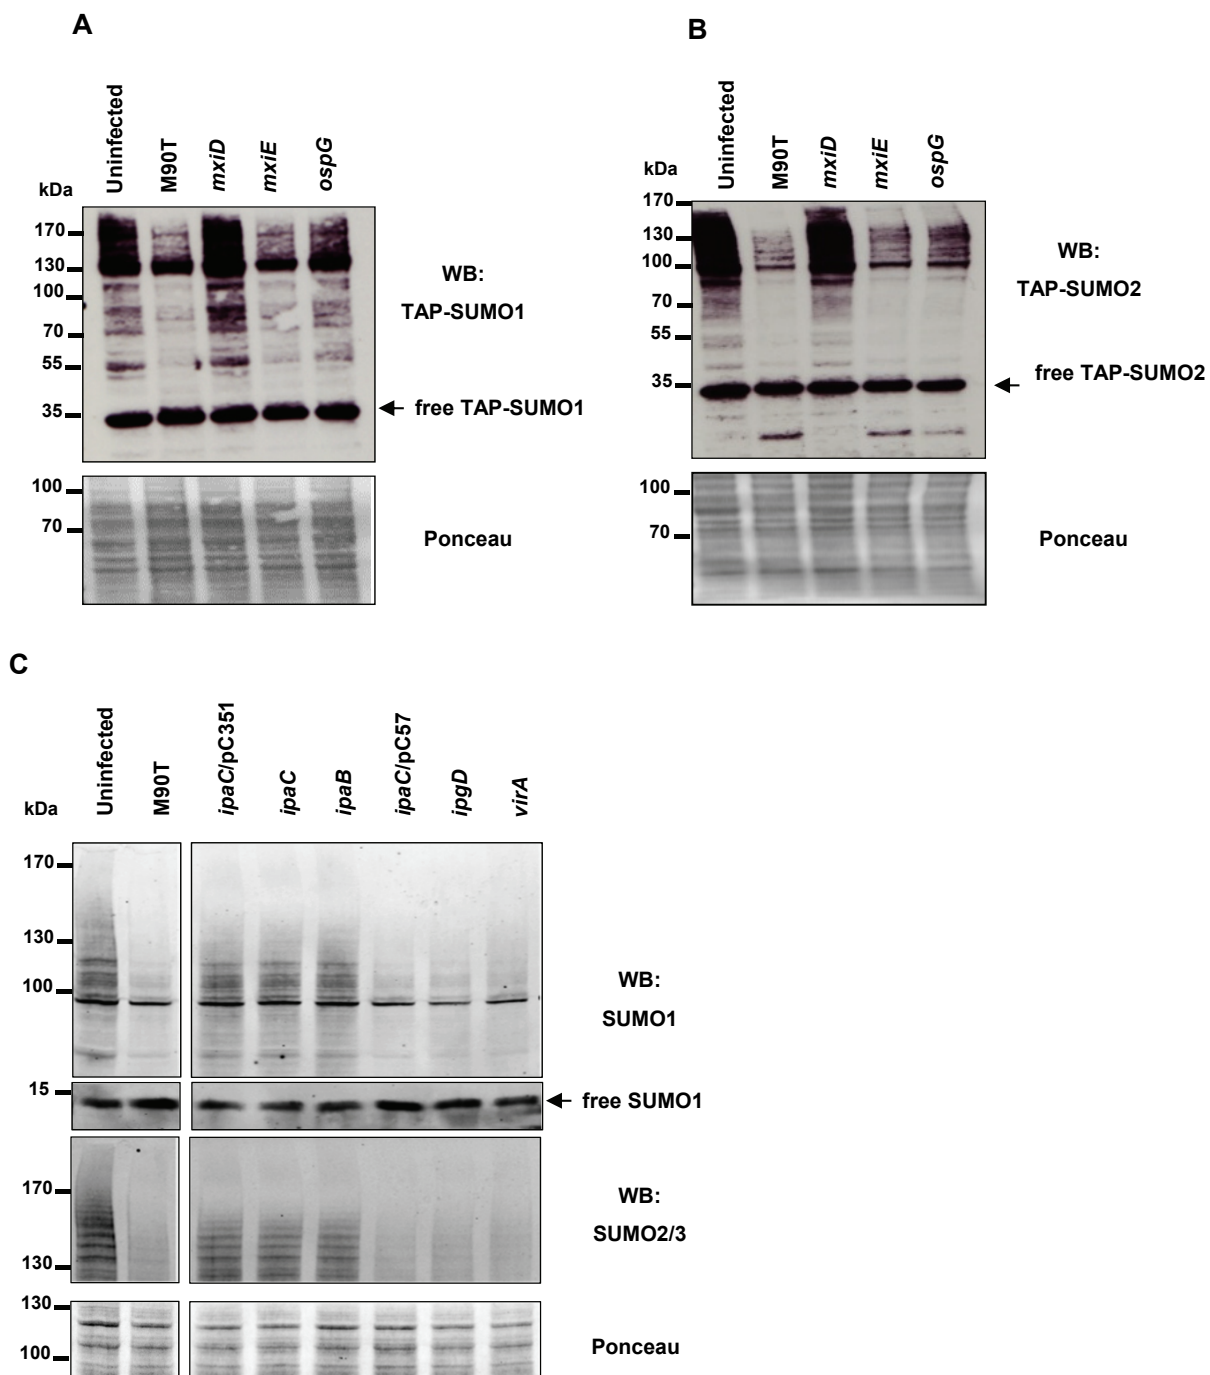

Figure 1-Figure supplement 2

Supplement: supp [file elife-27444-supp-v1.zip]

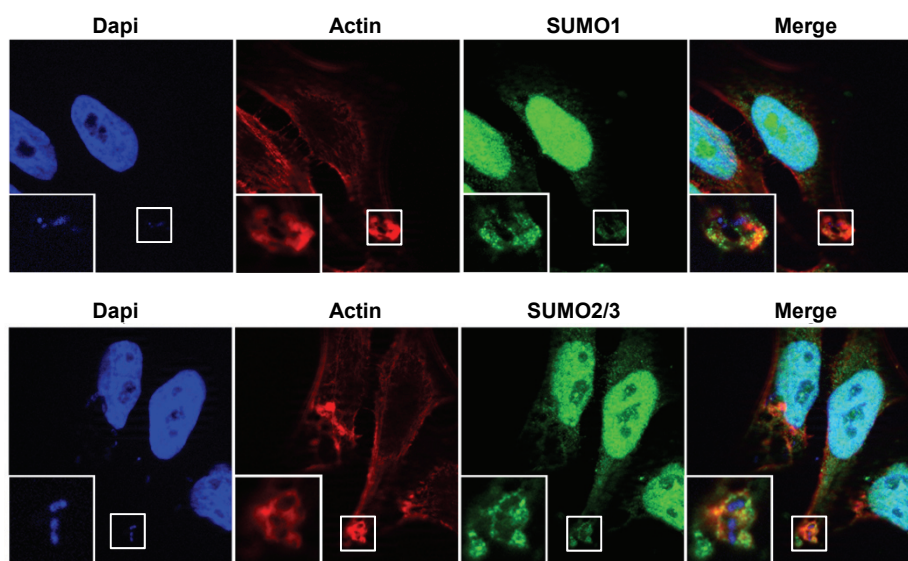

**Figure 7-Figure supplement 1**

Supplement: supp [file elife-27444-supp-v1.zip]

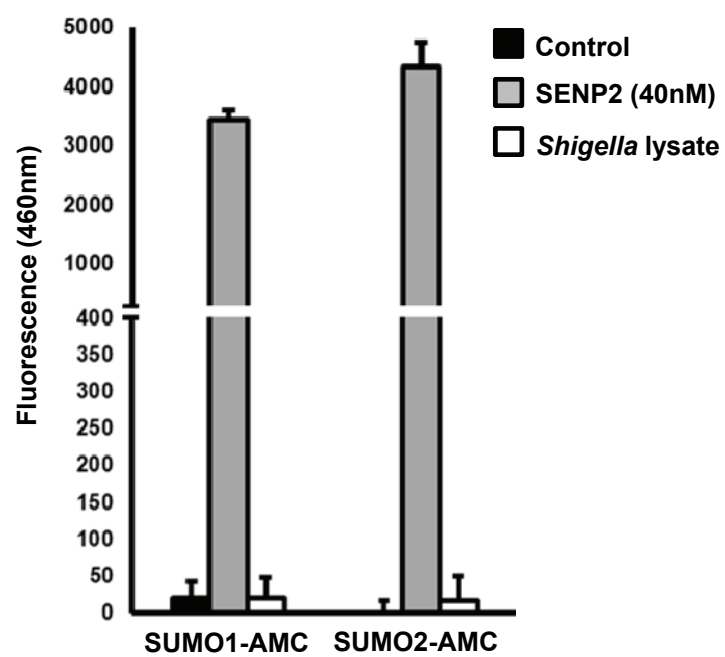

Figure 4-Figure supplement 1

Supplement: supp [file elife-27444-supp-v1.zip]

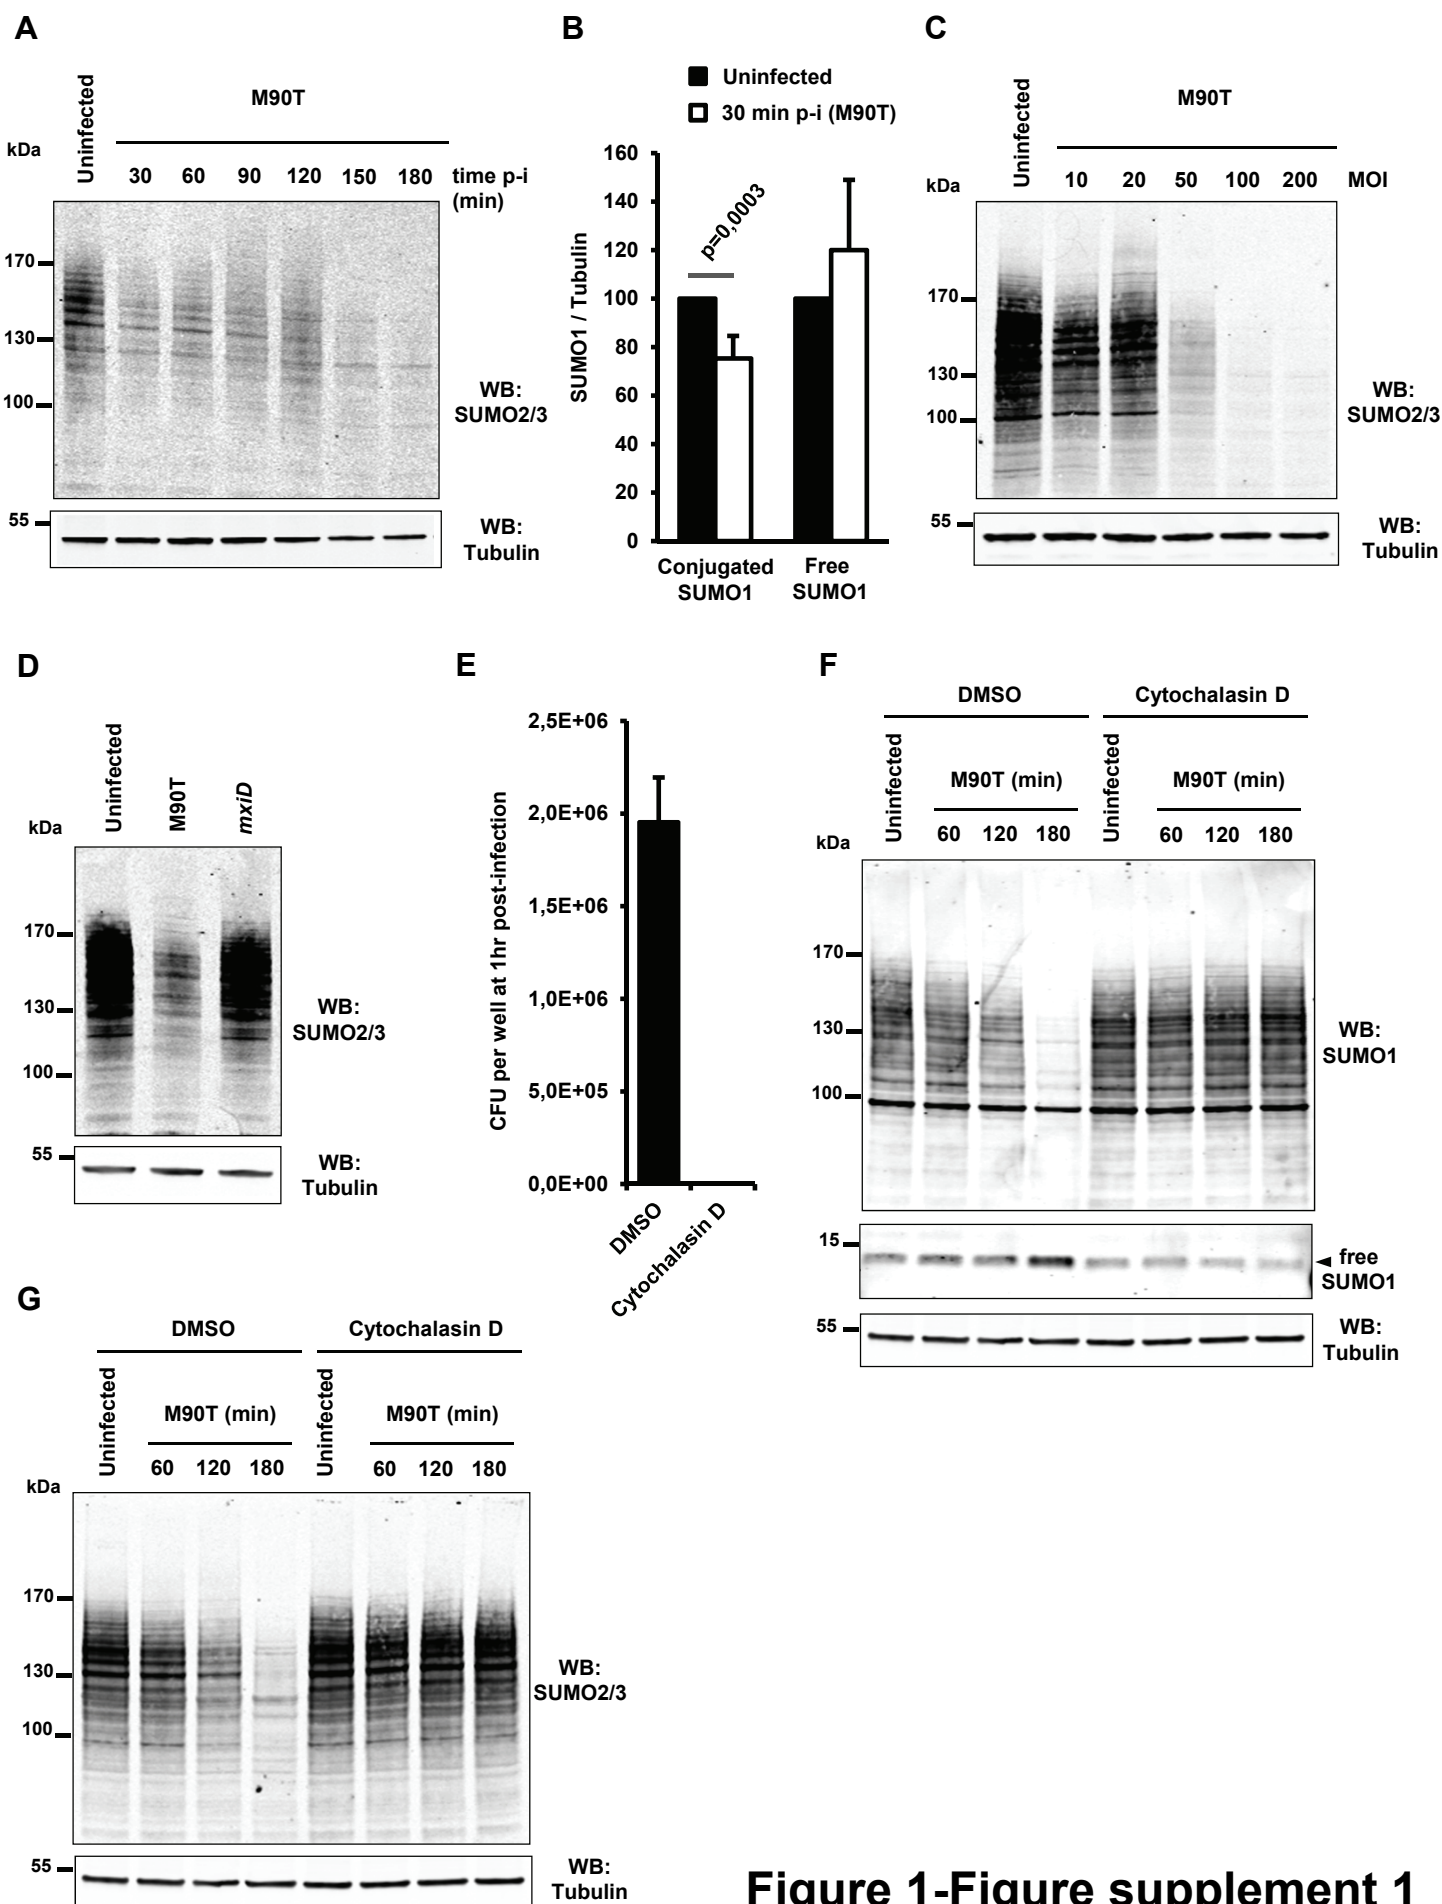

Figure 1-Figure supplement 1

Supplement: supp [file elife-27444-supp-v1.zip]

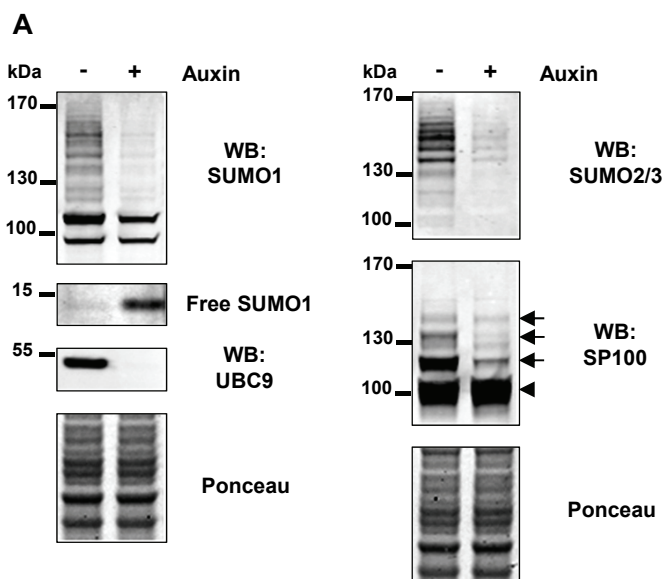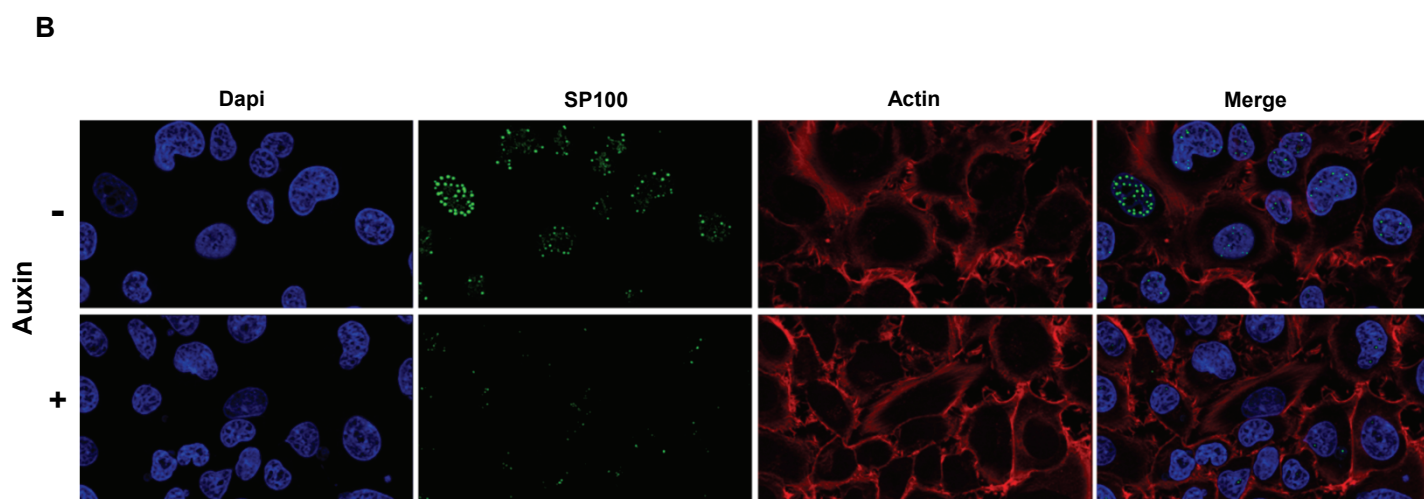

**Figure 5-Figure supplement 1**

Supplement: supp [file elife-27444-supp-v1.zip]
